# Supplementary material
Source: PubMed Central journal article supplement (PMC4346251)

Figure S1

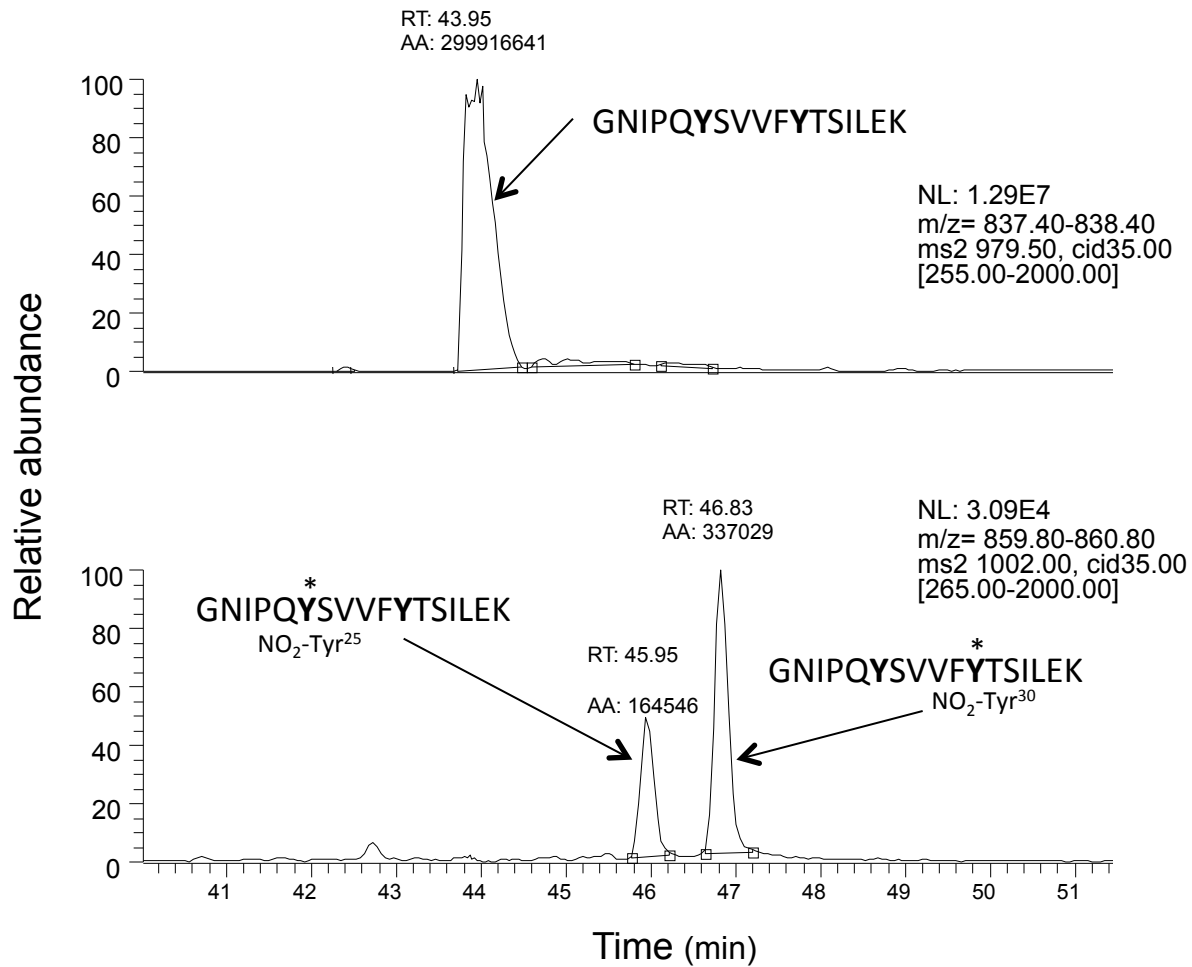

Supplement: NIHMS657702-supplement-Supp_FigureS1.pdf [file NIHMS657702-supplement-Supp_FigureS1.pdf]

Figure S2

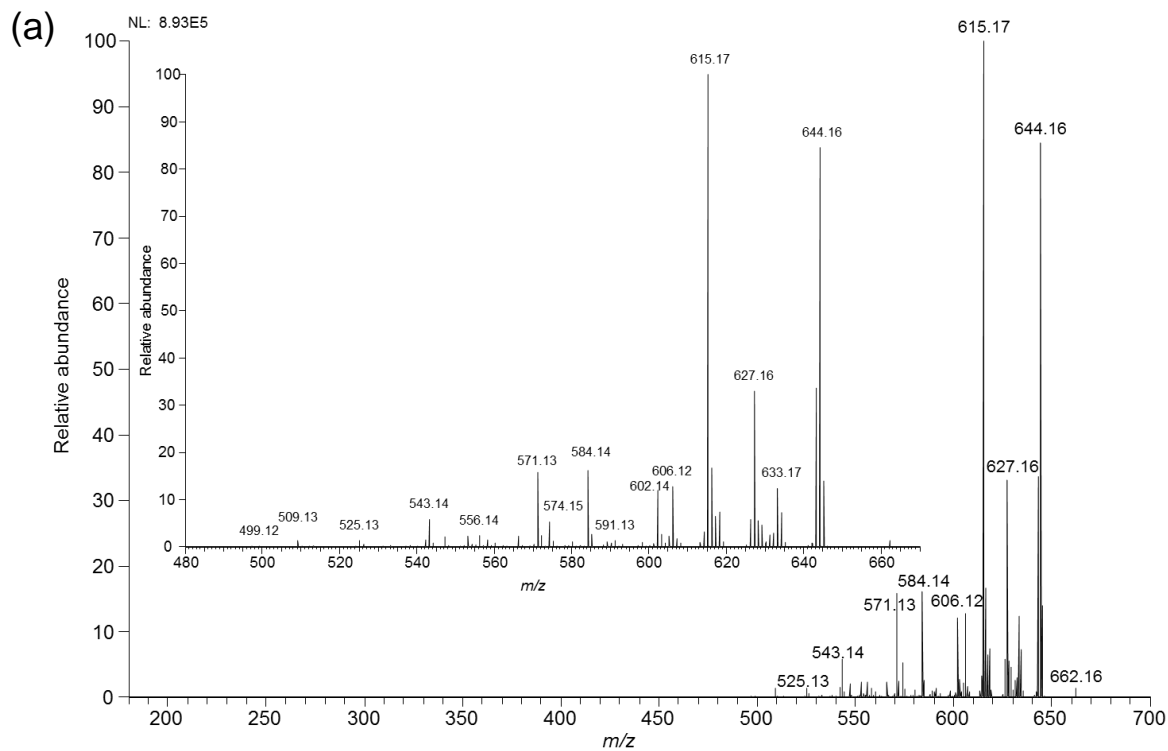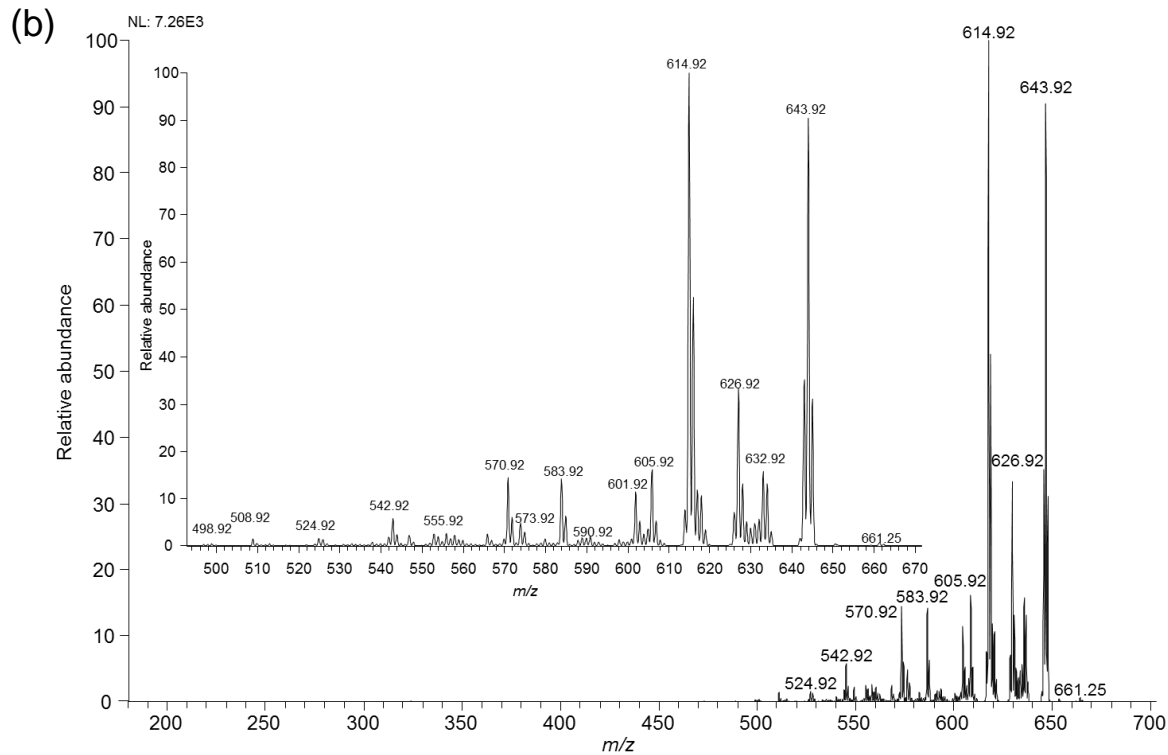

Supplement: NIHMS657702-supplement-Supp_FigureS2.pdf [file NIHMS657702-supplement-Supp_FigureS2.pdf]
